# Supplementary material
Source: publisher figshare collection journal article supplement (https://frontiersin.figshare.com/ndownloader/files/13557479)
Supplement: Supplementary file [file 13557479]

**Supplementary material****Suppl. Table 1.** Drug monitoring data of kidney recipients at one-year post-transplant

| Variables            | TAC5/EVR<br>(80)             | TAC10/EVR<br>(96)             | TAC10/MPS<br>(93)            | p-Value |
|----------------------|------------------------------|-------------------------------|------------------------------|---------|
| <b>Tacrolimus</b>    |                              |                               |                              |         |
| Concentration, ng/mL | 4.5 [3.7 – 5.8] <sup>a</sup> | 4.7 [3.4 – 6.4] <sup>a</sup>  | 5.8 [4.4 – 7.2] <sup>b</sup> | <0.0001 |
| Dose, mg/kg          | 3.0 [2.0 – 4.0] <sup>a</sup> | 3.0 [2.0 – 6.0] <sup>ab</sup> | 4.0 [3.0 – 6.0] <sup>b</sup> | 0.007   |
| Co/D, ng/mL*mg       | 1.53 [0.93 – 2.35]           | 1.52 [1.00 – 2.34]            | 1.37 [0.98 – 2.13]           | 0.939   |
| <b>Everolimus</b>    |                              |                               |                              |         |
| Concentration, ng/mL | 6.2 [5.1 – 7.5]              | 5.6 [4.6 – 6.8]               | -                            | 0.073   |
| Dose, mg/kg          | 4.0 [3.0 – 4.0]              | 4.0 [3.0 – 4.1]               | -                            | 0.857   |
| Co/D, ng/mL*mg       | 1.80 [1.40 – 2.65]           | 1.53 [1.15 – 2.40]            | -                            | 0.177   |

Continuous variables are shown as median and interquartile range. Tacrolimus monitoring data were compared by Kruskal-Wallis test followed by Bonferroni's correction for multiple comparisons. Different superscript letters indicate significant differences. Everolimus monitoring data were compared by Mann-Whitney test. Co/Do, adjusted concentration for dose administered.

**Suppl. Table 2.** Association of gene polymorphisms with high serum creatinine in kidney recipients at one-year post-transplant: Univariable logistic regression analysis

| Polymorphism                 | Genotype | OR (95%CI)         | p-Value |
|------------------------------|----------|--------------------|---------|
| <i>MTOR</i> c.1437T>C        | CC       | 1.74 (0.96 – 3.15) | 0.067   |
|                              | CT+TT    | Reference          |         |
| <i>MTOR</i> c.2997C>T        | TT       | 1.30 (0.73 – 2.30) | 0.371   |
|                              | TC+CC    | Reference          |         |
| <i>MTOR</i> c.4731G>A        | AA       | 0.90 (0.50 – 1.62) | 0.726   |
|                              | AG+GG    | Reference          |         |
| <i>PPP3CA</i> c.249G>A       | GG       | 0.86 (0.46 – 1.62) | 0.646   |
|                              | GA+AA    | Reference          |         |
| <i>FKBP1A</i> n.259+24936T>C | TT       | 0.94 (0.60 – 1.49) | 0.807   |
|                              | TC+CC    | Reference          |         |
| <i>FKBP2</i> c.-2110G>T      | GG       | 1.19 (0.73 – 1.94) | 0.475   |
|                              | GT+TT    | Reference          |         |
| <i>FOXP3</i> c.-22-902A>G    | GG       | 1.41 (0.89 – 2.23) | 0.141   |
|                              | GA+AA    | Reference          |         |
| <i>FOXP3</i> c.-23+2882A>C   | CC       | 1.75 (1.07 – 2.86) | 0.025   |
|                              | CA+AA    | Reference          |         |

Analysis of *MTOR* polymorphisms was carried out with data from TAC5/EVR and TAC10/EVR groups. Serum creatinine was categorized in three groups (tertiles). The highest tertile (>1.50 mg/dL) was considered the risk group. OR: odds ratio; CI: Confidence interval.

**Suppl. Table 3.** Clinical variables associated with high serum creatinine in kidney recipients at one-year post-transplant: Univariable logistic regression analysis

| Independent variables       | Risk factor        | OR (95%CI)         | p-Value |
|-----------------------------|--------------------|--------------------|---------|
| <b>Model 1</b>              |                    |                    |         |
| Age                         | Per 1 year         | 0.99 (0.97 – 1.01) | 0.530   |
| Weight                      | Per 1 kg           | 1.03 (1.01 – 1.05) | 0.012   |
| Gender                      | Male               | 3.47 (1.87 – 6.46) | 0.0001  |
| Donor type                  | Deceased           | 0.85 (0.47 – 1.56) | 0.602   |
| Time on hemodialysis        | Per 1 month        | 1.00 (0.99 – 1.01) | 0.509   |
| Delayed graft function time | Per 1 day          | 1.02 (0.98 – 1.06) | 0.407   |
| Cold ischemia time          | Per 1 h            | 0.99 (0.97 – 1.02) | 0.692   |
| Acute rejection             | Presence           | 3.21 (1.28 – 8.05) | 0.013   |
| Proteinuria                 | Presence           | 1.98 (0.79 – 4.95) | 0.145   |
| CMV                         | Use of ganciclovir | 1.06 (0.35 – 3.22) | 0.921   |
| <b>Model 2</b>              |                    |                    |         |
| Age                         | Per 1 year         | 0.99 (0.97 – 1.00) | 0.121   |
| Weight                      | Per 1 kg           | 1.03 (1.01 – 1.05) | 0.002   |
| Gender                      | Male               | 4.00 (2.38 – 6.74) | 0.0001  |
| Donor type                  | Deceased           | 0.81 (0.50 – 1.31) | 0.381   |
| Time on hemodialysis        | Per 1 month        | 1.00 (0.99 – 1.01) | 0.843   |
| Delayed graft function time | Per 1 day          | 1.02 (0.99 – 1.06) | 0.206   |
| Cold ischemia time          | Per 1 h            | 0.99 (0.97 – 1.02) | 0.612   |
| Acute rejection             | Presence           | 3.41 (1.63 – 7.10) | 0.001   |
| Proteinuria                 | Presence           | 1.88 (0.86 – 4.12) | 0.112   |
| Therapy group*              | Presence           | 1.61 (0.99 – 2.62) | 0.055   |
| CMV                         | Use of ganciclovir | 1.08 (0.58 – 1.99) | 0.808   |

*Model 1: TAC5/EVR and TAC10/EVR groups. Model 2: All therapy groups. Serum creatinine was categorized in three groups (tertiles). The highest tertile (>1.50 mg/dL) was considered the risk group. OR: odds ratio; CI: Confidence interval. \*Reference: TAC/EVR therapy group.*

**Suppl. Table 4.** Variables associated with acute rejection in kidney recipients at one-year post-transplant:  
Univariable regression analysis

| Independent variables        | Risk Factor | OR (95%CI)          | p-Value |
|------------------------------|-------------|---------------------|---------|
| <b>Polymorphisms</b>         |             |                     |         |
| <i>MTOR</i> c.1437T>C        | Genotype    |                     |         |
|                              | CC          | Reference           |         |
|                              | CT+TT       | 1.25 (0.51 – 3.09)  | 0.609   |
| <i>MTOR</i> c.2997C>T        | TT          | Reference           |         |
|                              | TC+CC       | 1.07 (0.45 – 2.55)  | 0.859   |
| <i>MTOR</i> c.4731G>A        | AA          | Reference           |         |
|                              | AG+GG       | 3.37 (1.10 – 10.30) | 0.037   |
| <i>PPP3CA</i> c.249G>A       | GG          | Reference           |         |
|                              | GA+AA       | 0.82 (0.30 – 2.24)  | 0.681   |
| <i>FKBP1A</i> n.259+24936T>C | TT          | Reference           |         |
|                              | TC+CC       | 0.95 (0.48 – 1.86)  | 0.904   |
| <i>FKBP2</i> c.-2110G>T      | GG          | Reference           |         |
|                              | GT+TT       | 1.39 (0.66 – 2.93)  | 0.382   |
| <i>FOPX3</i> c.-22-902A>G    | GG          | Reference           |         |
|                              | GA+AA       | 1.14 (0.58 – 2.23)  | 0.735   |
| <i>FOXP3</i> c.-23+2882A>C   | CC          | Reference           |         |
|                              | CA+AA       | 0.88 (0.43 – 1.80)  | 0.725   |
| <b>Other variables</b>       |             |                     |         |
| Model 1                      |             |                     |         |
| Age                          | Per 1 year  | 0.98 (0.95 – 1.01)  | 0.139   |
| Weight                       | Per 1 kilo  | 1.03 (0.99 – 1.06)  | 0.074   |
| Donor type                   | Deceased    | 0.74 (0.33 – 1.67)  | 0.466   |
| Time on hemodialysis         | Per 1 month | 1.00 (0.99 – 1.02)  | 0.485   |
| Delayed graft function time  | Per 1 day   | 1.06 (1.03 – 1.10)  | 0.001   |
| Cold ischemia time           | Per 1 hour  | 1.00 (0.96 – 1.04)  | 0.880   |
| Model 2                      |             |                     |         |
| Age                          | Per 1 year  | 0.98 (0.95 – 1.00)  | 0.077   |
| Weight                       | Per 1 kilo  | 1.01 (0.98 – 1.03)  | 0.485   |
| Donor type                   | Deceased    | 0.91 (0.45 – 1.88)  | 0.807   |
| Time on hemodialysis         | Per 1 month | 1.00 (0.99 – 1.01)  | 0.932   |
| Delayed graft function time  | Per 1 day   | 1.11 (1.06 – 1.16)  | 0.0001  |
| Cold ischemia time           | Per 1 hour  | 1.01 (0.97 – 1.04)  | 0.712   |

Analysis for *MTOR* polymorphisms was carried out with data from TAC5/EVR and TAC10/EVR groups. Other gene polymorphisms and other variables were analyzed using data from all therapy groups. Model 1: TAC5/EVR and TAC10/EVR groups. Model 2: All therapy groups. OR: odds ratio; CI: Confidence interval.

**Suppl. Table 5.** Variables associated with secondary clinical outcomes in kidney recipients at one-year post-transplant: Univariable logistic regression

| Independent variables         | Risk factor        | OR (95%CI)          | p-Value |
|-------------------------------|--------------------|---------------------|---------|
| <b>Leukopenia</b>             |                    |                     |         |
| <i>FKBP2</i> c.-2110G>T       | GG genotype        | 3.87 (1.26 – 11.91) | 0.018   |
| Age                           | Per every 1 year   | 1.03 (0.99 – 1.07)  | 0.122   |
| Weight                        | Per every 1 kg     | 0.97 (0.93 – 1.01)  | 0.113   |
| Gender                        | Male               | 0.92 (0.30 – 2.82)  | 0.878   |
| Therapy group*                | TAC+MPS            | 3.66 (1.19 – 11.28) | 0.024   |
| CMV                           | Use of ganciclovir | 9.68 (3.08 – 30.38) | 0.0001  |
| <b>Constipation</b>           |                    |                     |         |
| <i>FKBP1A</i> n.259+24936T>C  | TC+CC genotype     | 2.40 (1.08 – 5.37)  | 0.033   |
| Age                           | Per every 1 year   | 1.01 (0.99 – 1.04)  | 0.425   |
| Weight                        | Per every 1 kg     | 1.00 (0.97 – 1.03)  | 0.986   |
| Gender                        | Male               | 2.15 (0.90 – 5.14)  | 0.087   |
| Therapy group*                | TAC+MPS            | 1.59 (0.77 – 3.30)  | 0.213   |
| <b>Epigastric pain</b>        |                    |                     |         |
| <i>FOXP3</i> c.-22-902A>G     | GA+AA genotype     | 2.15 (1.01 – 4.56)  | 0.047   |
| Age                           | Per every 1 year   | 1.01 (0.98 – 1.04)  | 0.428   |
| Weight                        | Per every 1 kg     | 1.01 (0.98 – 1.04)  | 0.468   |
| Gender                        | Male               | 0.83 (0.38 – 1.83)  | 0.648   |
| Therapy group*                | TAC+MPS            | 1.69 (0.81 – 3.53)  | 0.164   |
| <b>Nausea and/or vomiting</b> |                    |                     |         |
| <i>FOXP3</i> c.-23+2882A>C    | CA+AA genotype     | 2.38 (1.05 – 5.38)  | 0.038   |
| Age                           | Per every 1 year   | 1.03 (1.00 – 1.06)  | 0.038   |
| Weight                        | Per every 1 kg     | 1.01 (0.98 – 1.04)  | 0.587   |
| Gender                        | Male               | 2.12 (0.94 – 4.78)  | 0.071   |
| Therapy group*                | TAC+MPS            | 1.00 (0.43 – 2.35)  | 0.996   |

\*Reference: TAC+EVR therapy group. OR: odds ratio; CI: confidence interval; CMV: cytomegalovirus.

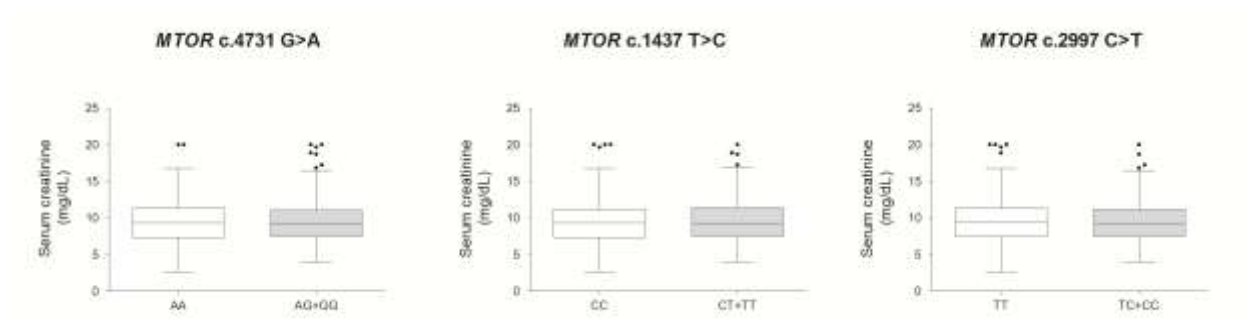

**SUPPL. FIGURE 1.** Influence of *MTOR* polymorphisms on pre-transplant serum creatinine levels in kidney recipients. Data are shown as box plots and interquartile range and compared by Mann-Whitney test. P>0.05.

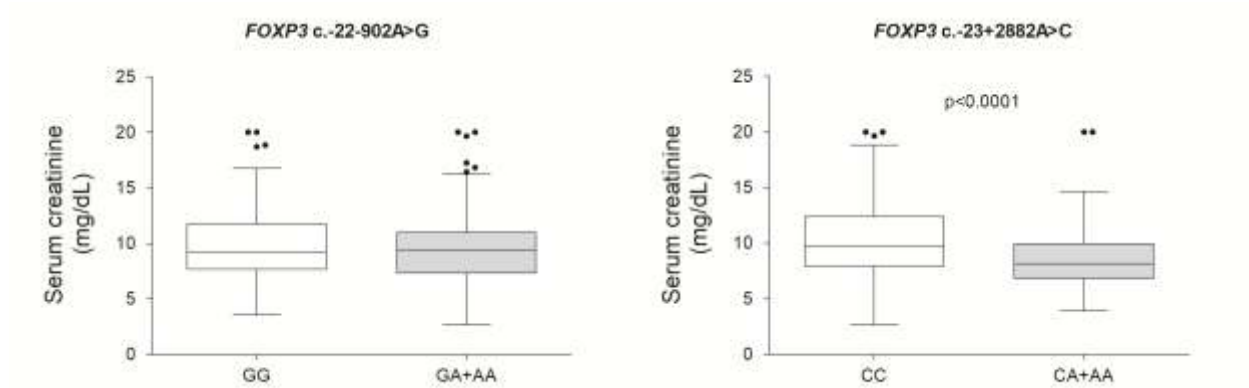

**SUPPL. FIGURE 2.** Influence of *FOXP3* polymorphisms on pre-transplant serum creatinine levels in kidney recipients. Data are shown as box plots and interquartile range and compared by Mann-Whitney test.
